# Supplementary material
Source: PubMed Central journal article supplement (PMC6194972)
Supplement: BJP_table_(3).pdf [file BJP_table_%283%29.pdf]

## Summary of Phantom Limb Pain studies

### Robinson et al

|                      |                                                                                                                             |
|----------------------|-----------------------------------------------------------------------------------------------------------------------------|
| <b>Methods</b>       | Randomized controlled trial                                                                                                 |
| <b>Participants</b>  | Thirty-nine persons with amputation-related pain lasting more than 6 months                                                 |
| <b>Interventions</b> | Six-week trial of amitriptyline started at 10mg daily (titrated up to 125mg/d) or an active placebo (benztropine mesylate). |
| <b>Outcomes</b>      | Primary outcomes - average pain intensity scores<br>Secondary outcomes - disability, satisfaction with life, handicap       |
| <b>Results</b>       | No significant effect on pain scores between the two groups                                                                 |
| <b>Conclusions</b>   | The authors did not support the use of amitriptyline in the treatment of post amputation pain                               |

### Bone et al

|                      |                                                                                                                                                                              |
|----------------------|------------------------------------------------------------------------------------------------------------------------------------------------------------------------------|
| <b>Methods</b>       | Randomized, double-blind, placebo-controlled, cross-over study                                                                                                               |
| <b>Participants</b>  | Nineteen patient with phantom limb pain                                                                                                                                      |
| <b>Interventions</b> | Six-week trial treatment of both placebo and gabapentin titrated in increments of 300 mg to 2400 mg or the maximum tolerated dose. One week washout period between therapies |
| <b>Outcomes</b>      | Primary outcome - visual analogue scale (VAS) pain intensity difference (PID) compared with baseline at the end of each                                                      |

|                    |                                                                                                                                                                                                                                                                                                                      |
|--------------------|----------------------------------------------------------------------------------------------------------------------------------------------------------------------------------------------------------------------------------------------------------------------------------------------------------------------|
|                    | treatment. Secondary outcome - indices of sleep interference, depression (Hospital Anxiety and Depression [HAD] scale), and activities of daily living (Bartel Index)                                                                                                                                                |
| <b>Results</b>     | PID was significantly greater than placebo for gabapentin therapy at the end of the treatment (3.2 +/- 2.1 v 1.6 +/- 0.7, P =.03). No significant differences between placebo and gabapentin therapy in terms of the number of tablets of rescue medication required, sleep interference, HAD scale, or Bartel Index |
| <b>Conclusions</b> | After 6 weeks, gabapentin monotherapy was better than placebo in relieving post amputation phantom limb pain                                                                                                                                                                                                         |

### Smith et al

|                      |                                                                                                                                                                              |
|----------------------|------------------------------------------------------------------------------------------------------------------------------------------------------------------------------|
| <b>Methods</b>       | Randomized, double-blind crossover trial                                                                                                                                     |
| <b>Participants</b>  | Twenty-four adults with phantom limb pain (PLP) and/or residual limb pain (RLP) with pain >3 on NRS                                                                          |
| <b>Interventions</b> | Six-week trial treatment of both placebo and gabapentin titrated in increments of 300 mg to 2400 mg or the maximum tolerated dose. One week washout period between therapies |
| <b>Outcomes</b>      | Primary - pain intensity<br>Secondary - pain interference, depression, life satisfaction, and functioning                                                                    |
| <b>Results</b>       | No significant differences between gabapentin and placebo on measures of pain                                                                                                |

|                         |                                                                                                                                                                                                                                                                                                                                                                                                                                                                                                                             |
|-------------------------|-----------------------------------------------------------------------------------------------------------------------------------------------------------------------------------------------------------------------------------------------------------------------------------------------------------------------------------------------------------------------------------------------------------------------------------------------------------------------------------------------------------------------------|
|                         | intensity                                                                                                                                                                                                                                                                                                                                                                                                                                                                                                                   |
| <b>Conclusions</b>      | Gabapentin does not provided significant pain relief for patients with PLP                                                                                                                                                                                                                                                                                                                                                                                                                                                  |
| <b>Nikolajsen et al</b> |                                                                                                                                                                                                                                                                                                                                                                                                                                                                                                                             |
| <b>Methods</b>          | Randomized trial                                                                                                                                                                                                                                                                                                                                                                                                                                                                                                            |
| <b>Participants</b>     | Forty-six patients scheduled to undergo lower limb amputation were randomly assigned to receive oral gabapentin or placebo                                                                                                                                                                                                                                                                                                                                                                                                  |
| <b>Interventions</b>    | Treatment was started on the first postoperative day and continued for 30 days. The daily dose of gabapentin or placebo was gradually increased to 2,400 mg/day                                                                                                                                                                                                                                                                                                                                                             |
| <b>Outcomes</b>         | Primary - intensity of stump and phantom pain.<br>Five interviews were performed after 7, 14, and 30 days and after 3 and 6 months                                                                                                                                                                                                                                                                                                                                                                                          |
| <b>Results</b>          | Risk of phantom pain (gabapentin vs. placebo) was 55.0% versus 52.6% (risk difference, 2.4%; 95% confidence interval, -28.9 to 33.7%; P = 0.88; 30 days) and 58.8% versus 50.0% (risk difference, 8.8%; 95% confidence interval, -23.3 to 40.9%; P = 0.59; 6 months). The median intensity of phantom pain (gabapentin vs. placebo) was 1.5 (range, 0-9.0) versus 1.2 (range, 0-6.6) (P = 0.60; 30 days) and 1.0 (range, 0-6.0) versus 0.5 (range, 0-5.0) (P = 0.77; 6 months). The median intensity of stump pain was 0.85 |

---

(range, 0-8.2) versus 1.0 (range, 0-5.4) (P = 0.68; 30 days) and 0 (range, 0-8.0) versus 0 (range, 0-5.0) (P = 0.58; 6 months)

**Conclusions**

Gabapentin administered in the first 30 postoperative days after amputation does not reduce the incidence or intensity of post amputation pain.

**Eichenberger et al**

---

**Methods**

Randomized , double-blind, crossover

**Participants**

Twenty patients with chronic PLP

**Interventions**

4 i.v. infusions of: 200 IE calcitonin; ketamine 0.4 mg/kg (only 10 patients); 200 IE of calcitonin combined with ketamine 0.4 mg/kg; placebo, 0.9% saline

**Outcomes**

Primary - VAS for PLP intensity recorded before, during, at the end, and the 48 h after each infusion  
Pain thresholds after electrical, thermal, and pressure stimulation were recorded before and during each infusion.

**Results**

Ketamine, but not calcitonin, reduced phantom limb pain. The combination was not superior to ketamine alone. There was no difference in basal pain thresholds between the amputated and contralateral side except for pressure pain. Pain thresholds were unaffected by calcitonin. The analgesic effect of the combination of calcitonin and ketamine was associated with a significant increase in electrical thresholds,

---

---

but with no change in pressure and heat thresholds.

**Conclusions**

Ketamine, but not calcitonin, affects central sensitization processes that are probably involved in the pathophysiology of phantom limb pain.

---

**Jaeger et al**

---

**Methods**

Randomized , double-blind, crossover

**Participants**

Twenty patients with chronic PLP who underwent major amputations and developed severe PLP 0-7 days after surgery

**Interventions**

For each patient a matched pair of infusions was prepared containing either 200 IU of s-CT or placebo. When PLP reached a level of more than 3 on a numeric analogue scale (NAS) the first infusion was administered

**Outcomes**

primary - NAS pain scores

**Results**

Using s-CT infusion, PLP was eased from a median of 7 to 4 on NAS in both groups (P less than 0.001)

Placebo did not change pain scores (median 7 on NAS, P greater than 0.1)

**Conclusions**

s-CT is a valuable treatment for PLP in the early postoperative period

---

**Nikolajsen, Hansen et al**

---

**Methods**

Double-blind saline-controlled study

**Participants**

11 patients with established stump and phantom limb pain

**Interventions**

Ketamine (bolus at 0.1 mg/kg/5 min)

---

|                    |                                                                                                                                                                                                                                                      |
|--------------------|------------------------------------------------------------------------------------------------------------------------------------------------------------------------------------------------------------------------------------------------------|
|                    | followed by an infusion of 7 micrograms/kg/min) was administered intravenously                                                                                                                                                                       |
| <b>Outcomes</b>    | Primary - visual analogue scale (VAS) and McGill Pain Questionnaire (MPQ)                                                                                                                                                                            |
| <b>Results</b>     | Ketamine increased pressure-pain thresholds significantly<br>Wind-up like pain (pain evoked by repeatedly tapping the dysaesthetic skin area) was reduced significantly by ketamine<br>no effect was seen on pain evoked by repeated thermal stimuli |
| <b>Conclusions</b> | NMDA receptor antagonists may have a potential in the treatment of stump and phantom limb pain.                                                                                                                                                      |

### Abraham et al

|                      |                                                                                                                                                           |
|----------------------|-----------------------------------------------------------------------------------------------------------------------------------------------------------|
| <b>Methods</b>       | Double-blind crossover trial                                                                                                                              |
| <b>Participants</b>  | 3 cancer amputee patients                                                                                                                                 |
| <b>Interventions</b> | Oral dextromethorphan (120-180 mg daily) was administered to three selected cancer patients during a 3-week period and an additional 1 month of treatment |
| <b>Outcomes</b>      | Primary - pain intensity<br>Secondary – mood, sedation levels                                                                                             |
| <b>Results</b>       | All patients reported a >50% decrease in pain intensity, better mood, and lower sedation                                                                  |
| <b>Conclusions</b>   | Dextromethorphan reduces persistent phantom limb pain satisfactorily                                                                                      |

## Wiech et al

|                      |                                                                                                                                                                                                                                                                 |
|----------------------|-----------------------------------------------------------------------------------------------------------------------------------------------------------------------------------------------------------------------------------------------------------------|
| <b>Methods</b>       | Placebo-controlled double-blinded crossover trial                                                                                                                                                                                                               |
| <b>Participants</b>  | 8 patients with chronic PLP                                                                                                                                                                                                                                     |
| <b>Interventions</b> | 30 mg memantine                                                                                                                                                                                                                                                 |
| <b>Outcomes</b>      | Primary - intensity of PLP was rated hourly by the patients on a visual analog scale during baseline and both treatment periods<br>Secondary – functional organization of the primary somatosensory cortex (SI) was determined by neuromagnetic source imaging. |
| <b>Results</b>       | No effect on the intensity of chronic PLP.<br>No significant changes in the functional organization of SI observed                                                                                                                                              |
| <b>Conclusions</b>   | Memantine is ineffective in the treatment of chronic PLP and is also ineffective for the reduction of associated neural plasticity in the primary SI                                                                                                            |

## Schley et al

|                      |                                                                                                                                                                                                                                                       |
|----------------------|-------------------------------------------------------------------------------------------------------------------------------------------------------------------------------------------------------------------------------------------------------|
| <b>Methods</b>       | Randomized, double-blind, controlled trial                                                                                                                                                                                                            |
| <b>Participants</b>  | 9 patients with acute traumatic amputation of the upper extremity                                                                                                                                                                                     |
| <b>Interventions</b> | All patients received postoperative analgesia by continuous brachial plexus anesthesia (ropivacaine 0.375% 5ml/h) for at least 7 days. In addition, the patients received either memantine (20–30mg daily, $n=10$ ) or placebo ( $n=9$ ) for 4 weeks. |
| <b>Outcomes</b>      | Primary - Number of ropivacaine bolus injections required                                                                                                                                                                                             |

|                    |                                                                                                                                                                                                                                                  |
|--------------------|--------------------------------------------------------------------------------------------------------------------------------------------------------------------------------------------------------------------------------------------------|
|                    | Secondary - PLP prevalence and intensity                                                                                                                                                                                                         |
| <b>Results</b>     | Memantine treatment reduced the number of requested ropivacaine bolus injections during the first week and resulted in a significant decrease of PLP prevalence and intensity at 4 weeks and 6 months follow up, but not at 12 months follow up. |
| <b>Conclusions</b> | Memantine can reduce intensity of phantom limb pain and might also prevent the development of PLP. However, despite the very early begin of treatment; no long-term effect on established PLP was evident.                                       |

## Huse et al

|                      |                                                                                                                                                                                                                                      |
|----------------------|--------------------------------------------------------------------------------------------------------------------------------------------------------------------------------------------------------------------------------------|
| <b>Methods</b>       | Double-blind crossover design                                                                                                                                                                                                        |
| <b>Participants</b>  | 12 patients with phantom limb pain after unilateral leg or arm amputation                                                                                                                                                            |
| <b>Interventions</b> | Two treatment phases of 4 weeks each were initiated with an intravenous test infusion of MST or Placebo. The titration phase was 2 weeks. The dose of MST was titrated to at least 70 mg/day and at highest 300 mg/day.              |
| <b>Outcomes</b>      | <p>Primary - Pain intensity was assessed hourly on visual analogue scales during a 4-week treatment-free phase, both treatment phases and at two follow-ups (6 and 12 months).</p> <p>Secondary - Perception and pain thresholds</p> |



---

**Results**

A clinically relevant response to MST (pain reduction of more than 50%) was evident in 42%, a partial response (pain reduction of 25-50%) in 8% of the patients.

Neuromagnetic source imaging of three patients showed initial evidence for reduced cortical reorganization under MST concurrent with the reduction in pain intensity

**Conclusions**

Opioids show efficacy in the treatment of phantom limb pain and may potentially influence also cortical reorganization

---

**Wu et al**

---

**Methods**

Randomized double-blind, active placebo-controlled, crossover trial

**Participants**

31 patients. Eleven subjects had both stump and phantom pains, 11 and 9 subjects had stump and phantom pain alone, respectively

**Interventions**

An intravenous bolus followed by an intravenous infusion of morphine (0.05 mg/kg bolus + 0.2 mg/kg infusion over 40 min), lidocaine (1 mg/kg bolus + 4 mg/kg infusion) and the active placebo, diphenhydramine (10 mg bolus + 40 mg infusion), were performed on three consecutive days.

**Outcomes**

Phantom and stump pain ratings and sedation scores were recorded at 5-min intervals using a 0-100 visual analog scale. Pain measures were initiated 30 min before drug infusion and continued until 30 min

---

after the end of infusion. Subjects' self-reported pain relief and satisfaction were assessed at the end of each infusion.

## Results

Compared with placebo, morphine reduced both stump and phantom pains significantly ( $P < 0.01$ ). In contrast, lidocaine decreased stump ( $P < 0.01$ ), but not phantom pain. The changes in sedation scores for morphine and lidocaine were not significantly different from placebo. Compared with placebo, self-reported stump pain relief was significantly greater for lidocaine ( $P < 0.05$ ) and morphine ( $P < 0.01$ ), while phantom pain relief was greater only for morphine ( $P < 0.01$ ).

Satisfaction scores were significantly higher for lidocaine (mean  $\pm$  SD: 39.3  $\pm$  37.8,  $P < 0.01$ ) and morphine (45.9  $\pm$  35.5,  $P < 0.01$ ) when compared with placebo (9.6  $\pm$  21.0).

## Conclusions

Stump pain was diminished both by morphine and lidocaine, while phantom pain was diminished only by morphine, suggesting that the mechanisms and pharmacological sensitivity of stump and phantom pains are different
